# Supplementary material for: Primary somatosensory cortex bidirectionally modulates sensory gain and nociceptive behavior in a layer-specific manner
Source: PubMed Central journal article supplement (PMC10209111; doi:10.1038/s41467-023-38798-7), 2023-05-24
Supplement: 41467_2023_38798_MOESM1_ESM.pdf [file 41467_2023_38798_MOESM1_ESM.pdf]

## Supplementary Materials

### **Primary Somatosensory Cortex Bidirectionally Modulates Sensory Gain and Nociceptive Behavior in a Layer-Specific Manner**

Katharina Ziegler<sup>1</sup>, Ross Folkard<sup>1</sup>, Antonio J Gonzalez<sup>1</sup>, Jan Burghardt<sup>1</sup>, Sailaja Antharvedi-Goda<sup>1</sup>, Jesus Martin-Cortecero<sup>1</sup>, Emilio Isaias-Camacho<sup>1</sup>, Sanjeev Kaushalya<sup>2</sup>, Linette Liqi Tan<sup>2</sup>, Thomas Kuner<sup>3</sup>, Claudio Acuna<sup>4</sup>, Rohini Kuner<sup>2</sup>, Rebecca A Mease<sup>1\*</sup> and Alexander Groh<sup>1\*</sup>

1 Medical Biophysics, Institute for Physiology and Pathophysiology, Heidelberg University, Germany

2 Department of Molecular Pharmacology, Institute for Pharmacology, Heidelberg University, Germany

3 Institute for Anatomy and Cell Biology, Heidelberg University, Germany

4 Chica and Heinz Schaller Research Group, Institute for Anatomy and Cell Biology, Heidelberg University, Germany

These authors contributed equally: Katharina Ziegler, Ross Folkard, Antonio J Gonzalez.

These authors jointly supervised this work: Rebecca A Mease, Alexander Groh.

\* Corresponding authors: Rebecca A Mease [beckin@gmail.com](mailto:beckin@gmail.com), Alexander Groh [groh@uni-heidelberg.de](mailto:groh@uni-heidelberg.de).

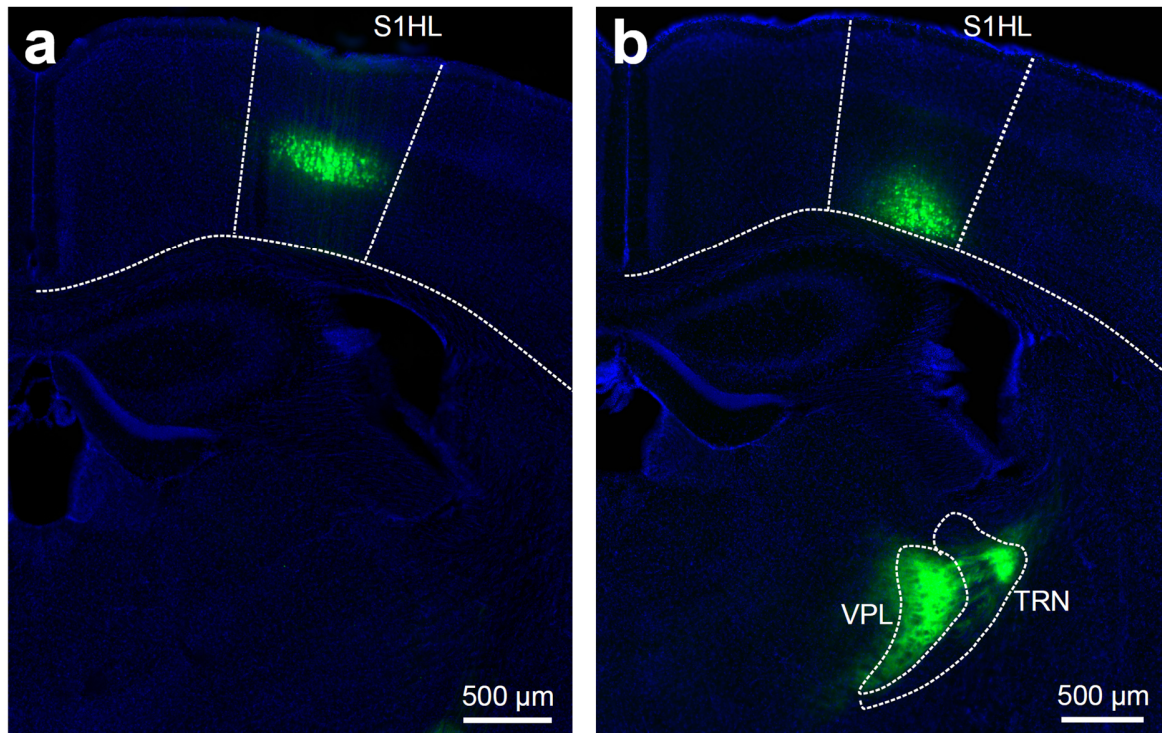

**Supplementary Fig. 1: EGFP expression in control animals. Related to Figures 1-6.**

**(a)** Cre-dependent expression of DIO-EGFP (green) in Layer 5 of the S1 hindlimb cortex (S1HL) of Rbp4-Cre mice. Representative example of  $n = 29$  independent experiments with similar results. **(b)** Cre-dependent expression of DIO-EGFP (green) in Layer 6 of the S1HL cortex of Ntsr1-Cre mice. Slices were stained with DAPI (blue). Representative example of  $n = 23$  independent experiments with similar results.

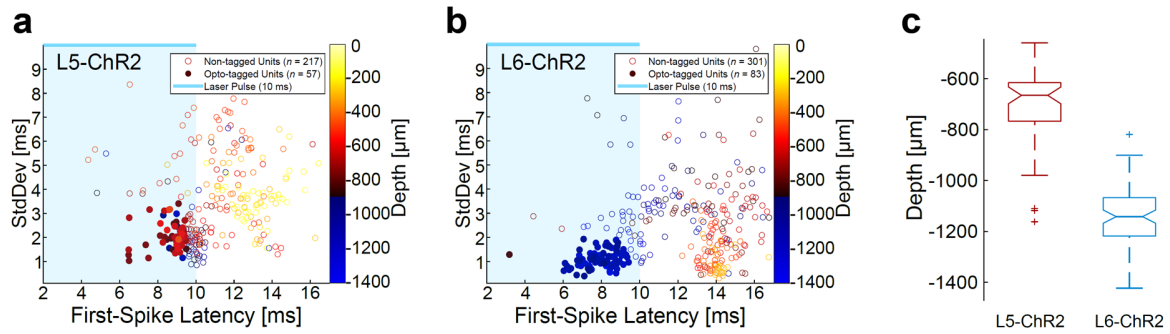

**Supplementary Fig. 2: Optotagging of L5-ChR2 and L6-ChR2 Single Units.**

10 Hz laser trains (10 ms pulse length) were given to Rbp4-Cre-ChR2-EYFP ( $n = 2$  mice) or Ntsr1-Cre-ChR2-EYFP mice ( $n = 3$  mice) as part of a 5 second on 5 second off protocol ( $> 1000$  pulses in total per mouse). The mean first-spike latency and the standard deviation of the first spike latency to all 10 ms laser pulses was calculated for every single unit from a pooled dataset of each mouse line. Putative fast-spiking (FS) units ( $\Delta_{\text{trough-to-second-peak}}$  of extracellular mean waveform  $< 215 \mu\text{s}^{-1}$ ) were removed from the tagged populations.

**(a)** Scatter plot of mean first spike latency and standard deviation of first spike latency in S1 hindlimb cortex (S1HL) of L5-ChR2 mice ( $n = 2$ ). Tagged units (57/274 - filled circles) were assigned by mean latency  $< 9.5$  ms and standard deviation  $< 3.5$  ms. **(b)** Scatter plot of mean first spike latency and standard deviation of first spike latency in S1HL of L6-ChR2 mice ( $n = 3$ ). Tagged units (83/384 - filled circles) were assigned by mean latency  $< 9.5$  ms and standard deviation  $< 2$  ms. **(c)** Box and Whisker plot of Opto-tagged unit depths for L5-ChR2 and L6-ChR2 data in **(a)** and **(b)**. The median L5-ChR2 unit depth was  $-665.5 \mu\text{m}$  (IQR =  $151.5 \mu\text{m}$ ), and the median L6-ChR2 unit depth was  $-1157.5 \mu\text{m}$  (IQR =  $150.75 \mu\text{m}$ ). Source data for a-c are provided as a Source Data file.

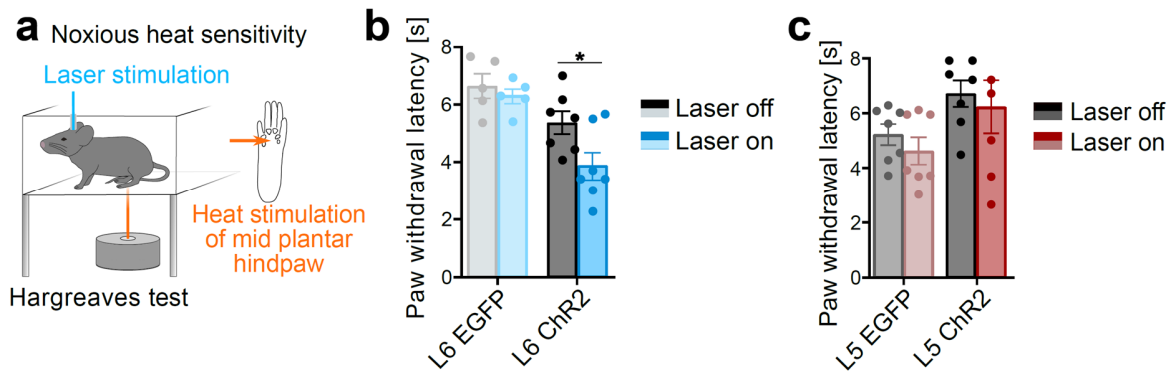

### Supplementary Fig. 3. Hargreaves test in Layer 6 (L6) and Layer 5 (L5).

**(a)** Schematic of Hargreaves test<sup>2</sup> to quantify noxious heat sensitivity in response to noxious heat laser stimulation (orange) of the hindpaw with and without optogenetic stimulation in S1 hindlimb cortex (S1HL).

**(b)** Paw withdrawal latencies in response to heat stimulation of the left hindpaw with (blue, Laser on, 5 s continuous pulse) and without (black/gray, Laser off) optogenetic stimulation of contralateral L6 corticothalamic (L6-CT) neurons in S1HL of L6-EGFP ( $n = 5$ ) and L6-ChR2 ( $n = 7$ ) mice.

**(c)** Paw withdrawal latencies in response to heat stimulation of the left hindpaw with (Laser on, red, 5 s continuous pulse) and without (black, Laser off) optogenetic stimulation of L5 in the contralateral S1HL of L5-EGFP ( $n = 7$ ) and L5-ChR2 ( $n = 7$ ) mice.

\* represent  $p < 0.05$ ; b-c: two-way repeated measures ANOVA with post-hoc Bonferroni test. Exact  $F$  and  $p$  values in Supplementary Table 1. Data are shown as mean  $\pm$  S.E.M. Source data for b-c are provided as a Source Data file.

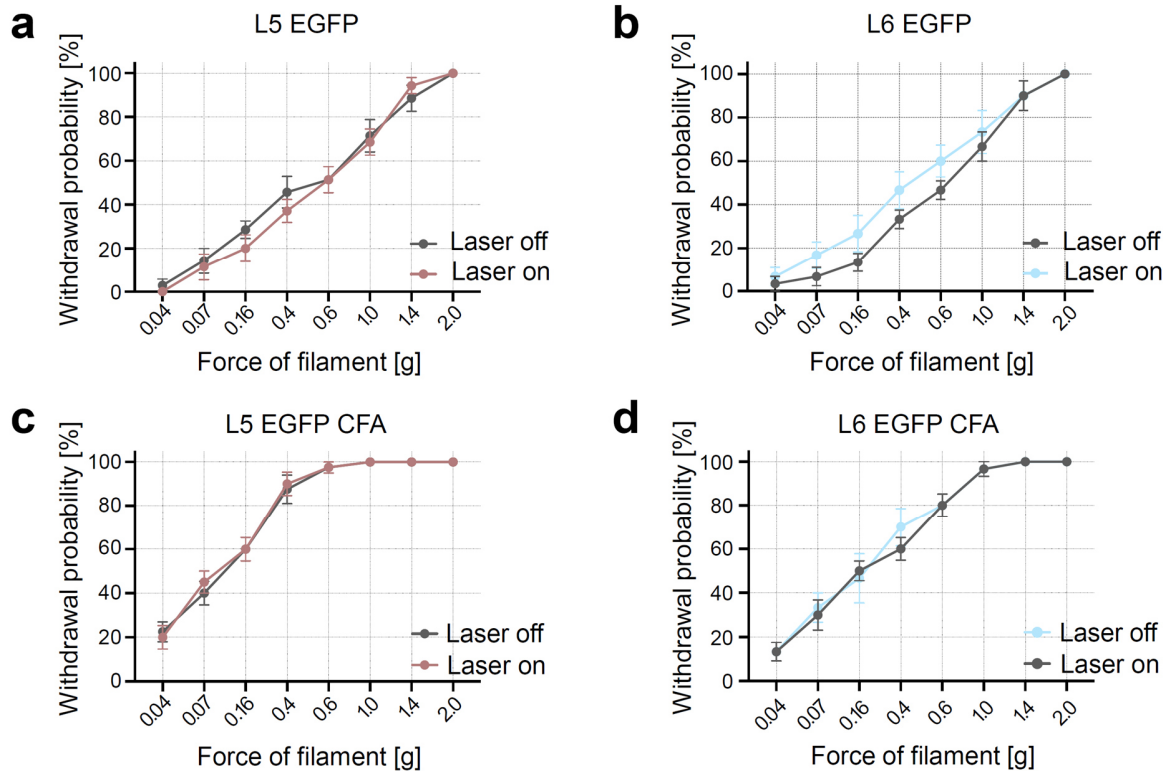

**Supplementary Fig. 4: von Frey mechanical sensitivity test in EGFP control mice with and without optogenetic stimulation in S1 hindlimb cortex (S1HL) with a fiber implant. Related to Figures 2, 5 and 6.**

Each panel shows averaged within-animal comparison of paw withdrawal probabilities in response to graded von Frey stimulation of the hindpaw at baseline (Laser off, black lines) and during laser stimulation (Laser on, 5 s continuous, red and blue lines) in the contralateral S1HL of Rbp4-Cre (red lines) and Ntsr1-Cre (blue lines) mice injected with AAV-DIO-EGFP. **(a)** L5-EGFP,  $n = 6$  mice **(b)** L6-EGFP,  $n = 6$  mice **(c)** L5-EGFP, Complete Freund's adjuvant (CFA),  $n = 8$  mice **(d)** L6-EGFP, CFA,  $n = 6$  mice.

Two-way repeated measures ANOVA with post-hoc Bonferroni test. Exact  $F$  and  $p$  values in Supplementary Table 1. Data are shown as mean  $\pm$  S.E.M. Source data for a-d are provided as a Source Data file.

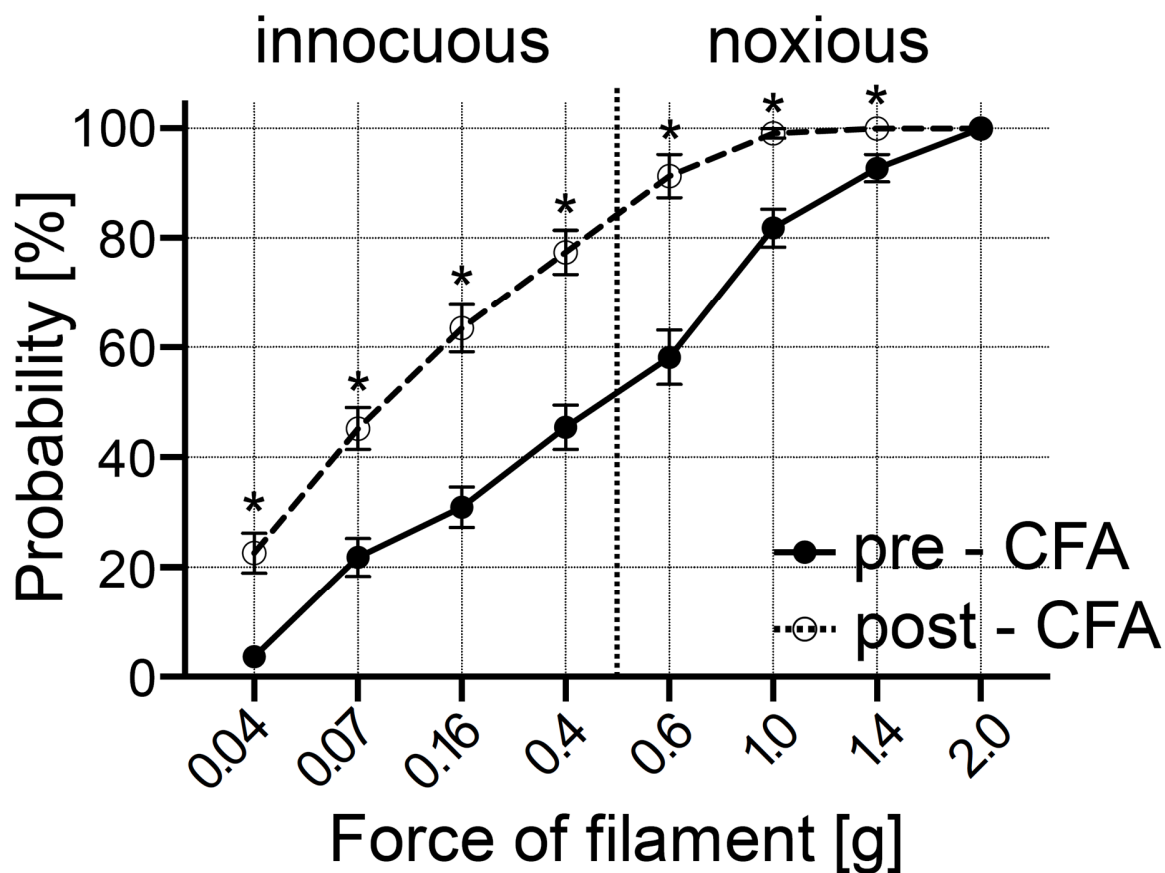

**Supplementary Fig. 5: Complete Freund's adjuvant (CFA)-Inflammatory pain model. Related to Figures 2, 5 and 6.**

Within animal comparison of paw withdrawal probabilities in response to graded von Frey stimulation of the hindpaw at Baseline pre-CFA (black line) and after injection of Complete Freund's adjuvant (Baseline post-CFA; dashed line) in the left hindpaw, which led to mechanical hypersensitivity to innocuous and noxious stimuli.

$n = 22$  mice;  $p < 0.001$ ; two-way repeated measures ANOVA with post-hoc Bonferroni test. Exact  $F$  and  $p$  values in Supplementary Table 1. Data are shown as mean  $\pm$  S.E.M. Source data for are provided as a Source Data file.

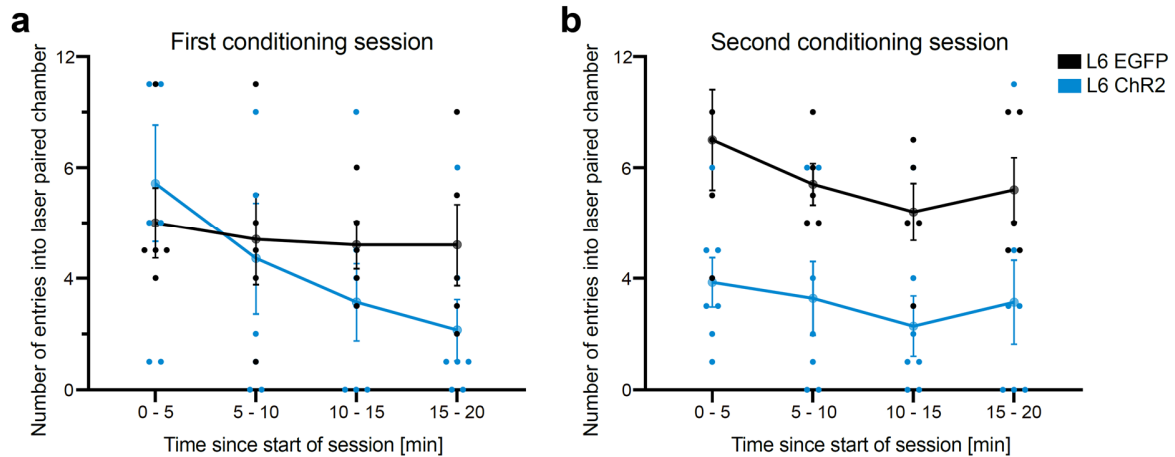

**Supplementary Fig. 6. Reentry analysis of conditioned place aversion test (CPA) shows that stimulation of layer 6 corticothalamic neurons leads to both acute and learned aversion. Related to Figure 2.**

Analysis of the number of entries to the laser-paired chamber within and across the two conditioning sessions (panels **(a)** and **(b)**, respectively), each session divided into four time intervals to track within-session changes. Data shows that for L6-ChR2 mice (1.) entries dropped throughout the first conditioning session and (2.) that already at the beginning of the second conditioning session, experimental L6-ChR2 mice started out at low entry levels, strongly indicating learned aversion.

L6-EGFP  $n = 5$  and L6-ChR2  $n = 7$  mice. Data are shown as mean  $\pm$  S.E.M. Source data for a, b are provided as a Source Data file.

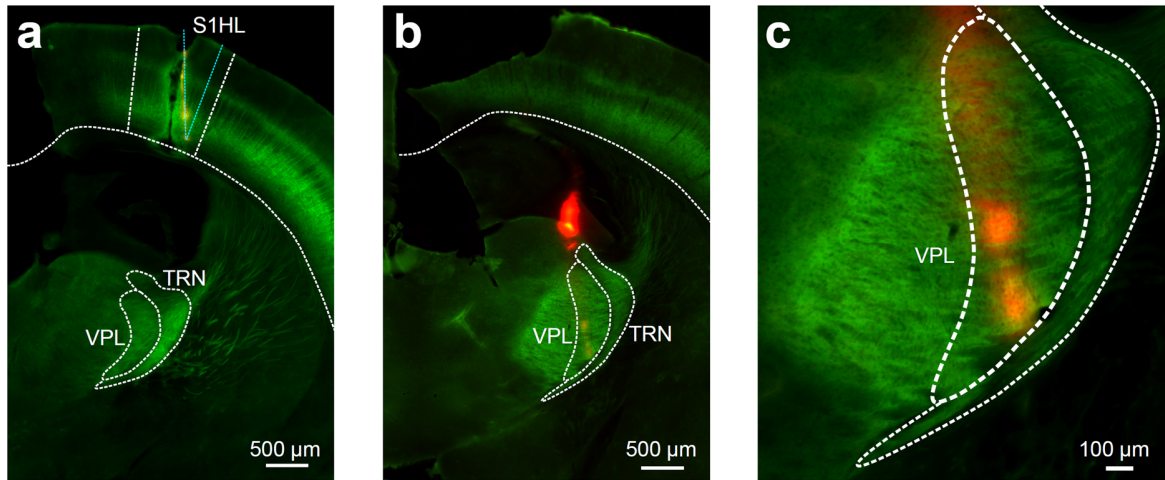

**Supplementary Fig. 7. Recovery of silicon probe recording sites in S1 hindlimb cortex (S1HL) and ventral posterolateral thalamus (VPL). Related to Figures 3 and 4.**

Example coronal sections of dyed (red) silicon probe location in **(a)** S1HL cortex and **(b, c)** VPL of *Ntsr1-Cre-ChR2-EYFP* (green) mouse. Representative example of 4 independent experiments with similar results.



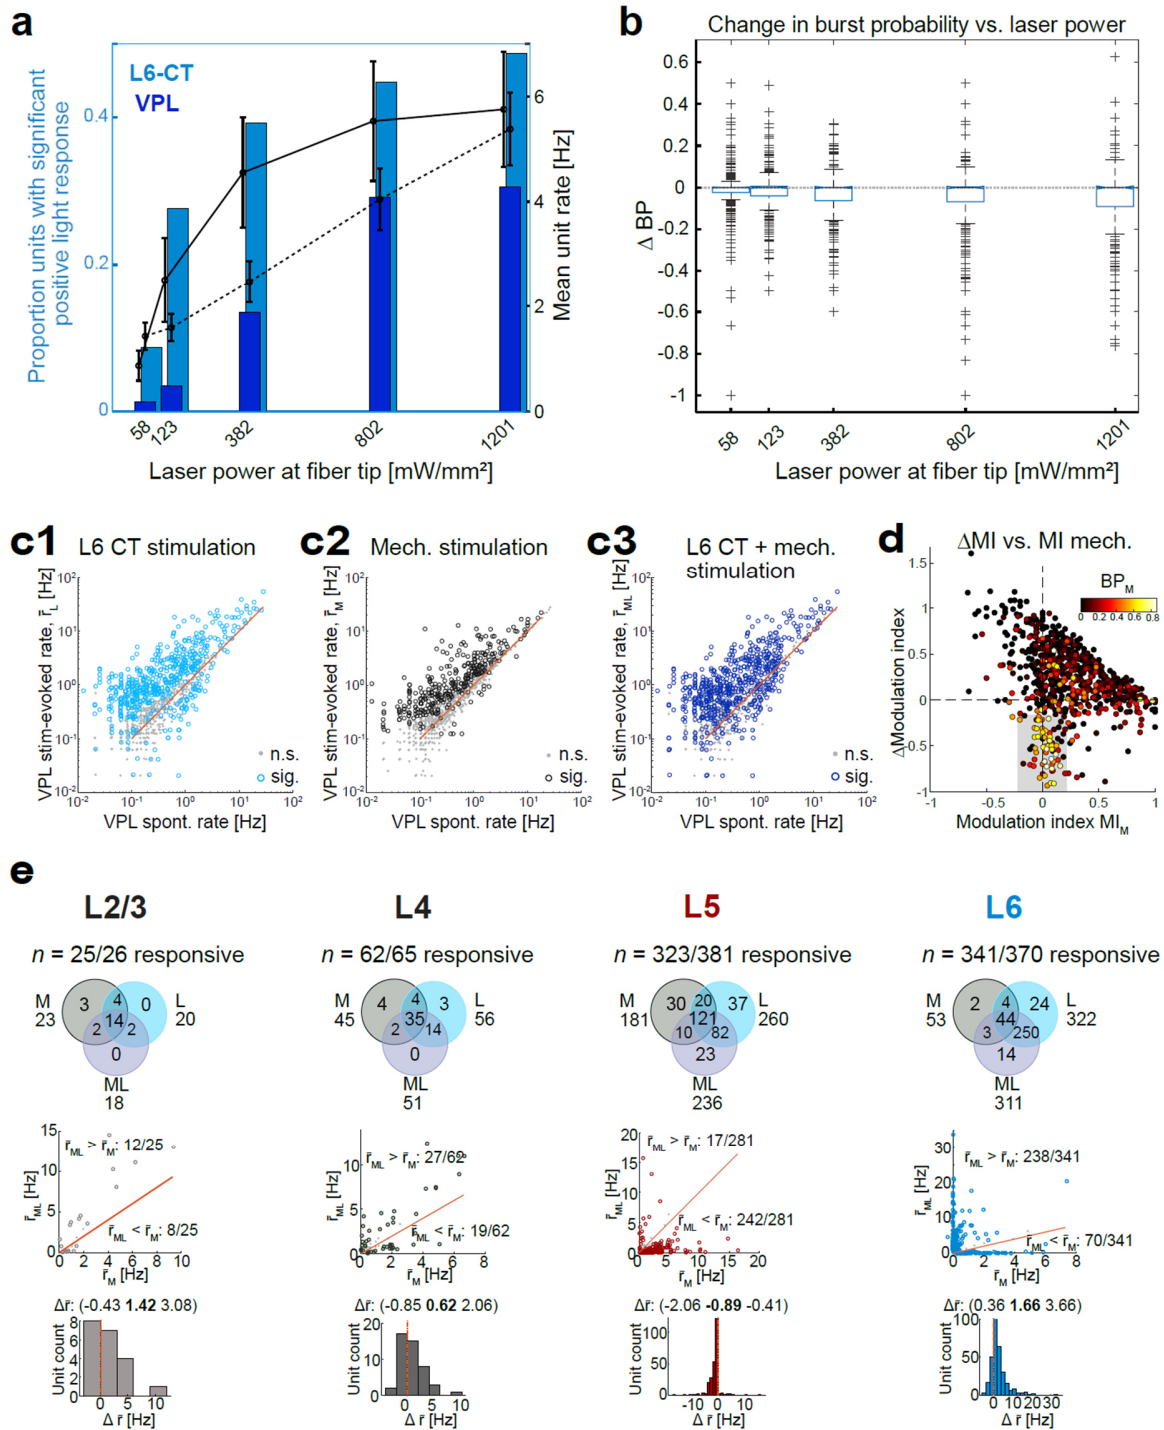

**Supplementary Fig. 8. Layer 6 corticothalamic (L6-CT) stimulation (ChR2) effects on ventral posterolateral thalamus (VPL) and S1 hindlimb cortex (S1HL) activity. Related to Figures 3 and 4.**

(a) Proportion of laser-responsive units (bar plots) and evoked firing rates (line plots) in L6-CT (blue bars, black line,  $n = 92$  units) and VPL (dark blue bars, black dashed line,  $n = 169$

units) recorded simultaneously as a function of laser power from an exemplar experiment ( $n = 4$  mice). Data are shown as mean  $\pm$  S.E.M.

**(b)** Change in bursting probability ( $\Delta BP$ ) (laser-evoked vs. baseline) in VPL is a function of laser power ( $n = 169$  units), Kruskal-Wallis test,  $p = 0.013$ .

**(c1,2,3)** Stimulus-evoked spiking rate ( $\bar{r}_L$ ,  $\bar{r}_M$ ,  $\bar{r}_{ML}$ ) vs. spontaneous spiking rate by VPL unit. Open markers: significantly modulated units in each condition ( $n = 536, 333, 623$ , for L, M, ML, respectively). Filled circles: not significantly modulated. Diagonal lines indicate equal responses. Central tendency and dispersion presented as (1st quartile **median** 3rd quartile):  $\bar{r}_L$  (0.54 **1.07** 2.60) Hz,  $\bar{r}_M$  (0.47 **0.99** 2.3) Hz,  $\bar{r}_{ML}$  (0.69 **1.31** 3.24) Hz.

**(d)** Scatter plot:  $\Delta MI$  vs.  $MI_M$  for individual VPL units ( $\Delta MI = MI_{ML} - MI_M$ ). Each unit is colored by  $BP_M$ . A subset of bursty units had near-zero  $MI_M$  and  $MI_{ML} < 0$  (gray box), suggesting that non-sensory coding VPL units are suppressed by L6-CT activation which further increases the overall proportion of sensory-driven VPL spike output.

**(e)** Breakdown of S1HL layer-specific population responses to L/M/ML conditions; **Upper row:** Population overlap of L/M/ML - encoding units in each layer. **Middle row:** comparison of  $\bar{r}_{ML}$  vs.  $\bar{r}_M$  for all units showing significant difference in firing rate between M and ML conditions ( $p < 0.05$ , signed rank). **Lower row:** distribution of  $\Delta \bar{r} = \bar{r}_{ML} - \bar{r}_M$  for each unit, negative values correspond to L6-CT-suppressed units and positive values to L6-CT enhanced units. Layer 5 (L5) was significantly more suppressed than other layers (Supplementary Table 2). Source data for a-e are provided as a Source Data file.

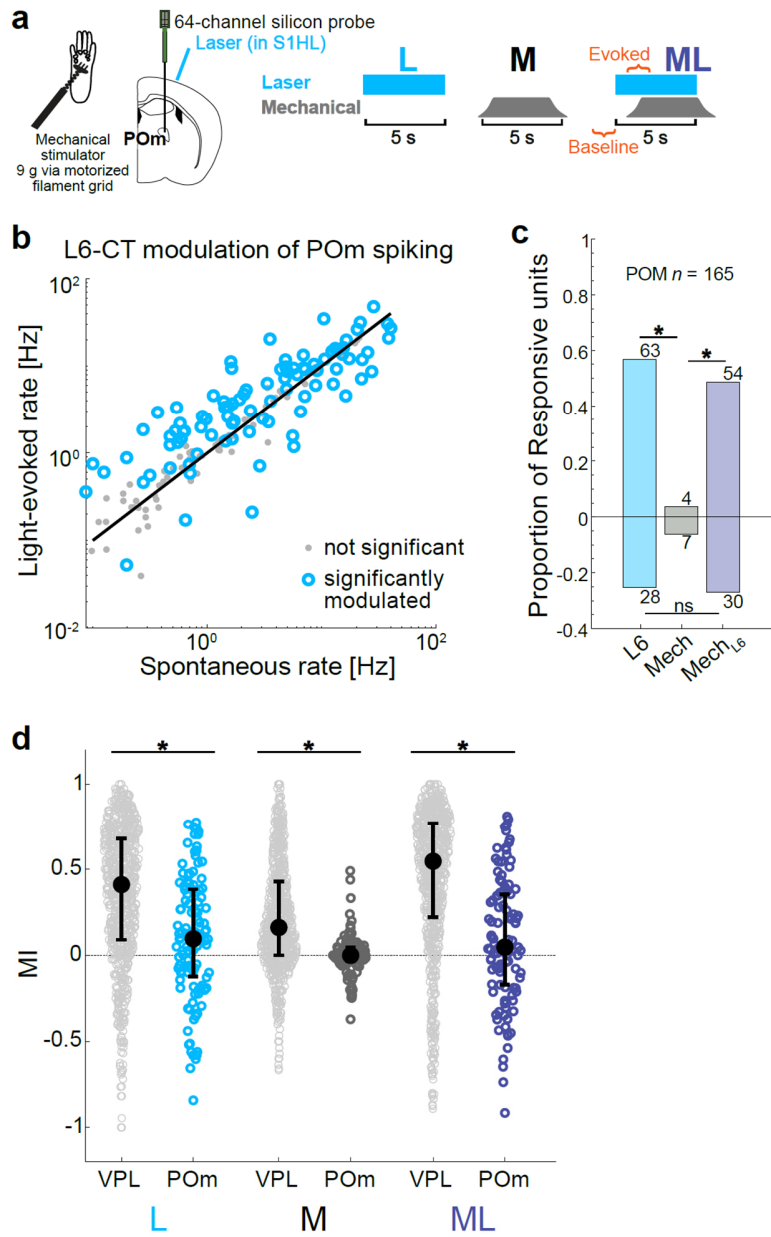

**Supplementary Fig. 9. Heterogeneous effects of L6-CT activation on posterior medial (POm) thalamic units.**

**(a)** Combined mechanical and L6-CT stimulation paradigm was identical to that used for VPL experiments (Fig. 3). 165 POm units were pooled from silicon probe recording in two anesthetized ChR2-expressing Ntsr1-Cre mice.

**(b)** Optogenetic stimulation of L6-CT neurons modulates spontaneous spiking in POm.

**(c)** Enhanced/suppressed fractions by condition. 111/165 neurons were modulated in at least one condition. 91/111 units were significantly modulated by light alone, with 63/91 enhanced and 28/91 suppressed. Two-sided  $X^2$  test followed by Marascuillo procedure ( $p < 0.01$ ). POm proportions significantly favored suppression (two-sided McNemar's test,  $p < 0.01$ ) in comparison to VPL in all conditions (see VPL proportions in Fig. 3c).

**(d)** Comparison of stimulus-evoked modulation of VPL and POm units. L6-CT optogenetic stimulation alone and in combination with mechanical stimulus largely enhanced VPL spiking but had more mixed effects on POm spiking; POm ( $n = 111$  units) was largely insensitive to mechanical stimulus alone compared to VPL ( $n = 742$  units). VPL  $MI_L$  (0.09 **0.41** 0.68) > POm  $MI_L$  (-0.12 **0.10** 0.38); VPL  $MI_M$  (0.0 **0.16** 0.43) > POm  $MI_M$  (-0.03 **0.00** 0.05); VPL  $MI_{ML}$  (0.22 **0.55** 0.77) > POm  $MI_{ML}$  (-0.17 **0.05** 0.35) ( $p < 0.001$ ).

Data shown as median and interquartile range. One-sided rank-sum test (right-tailed). \* represents  $p < 0.05$ ; exact  $p$  values in Supplementary Table 1. Source data for b-d are provided as a Source Data file.

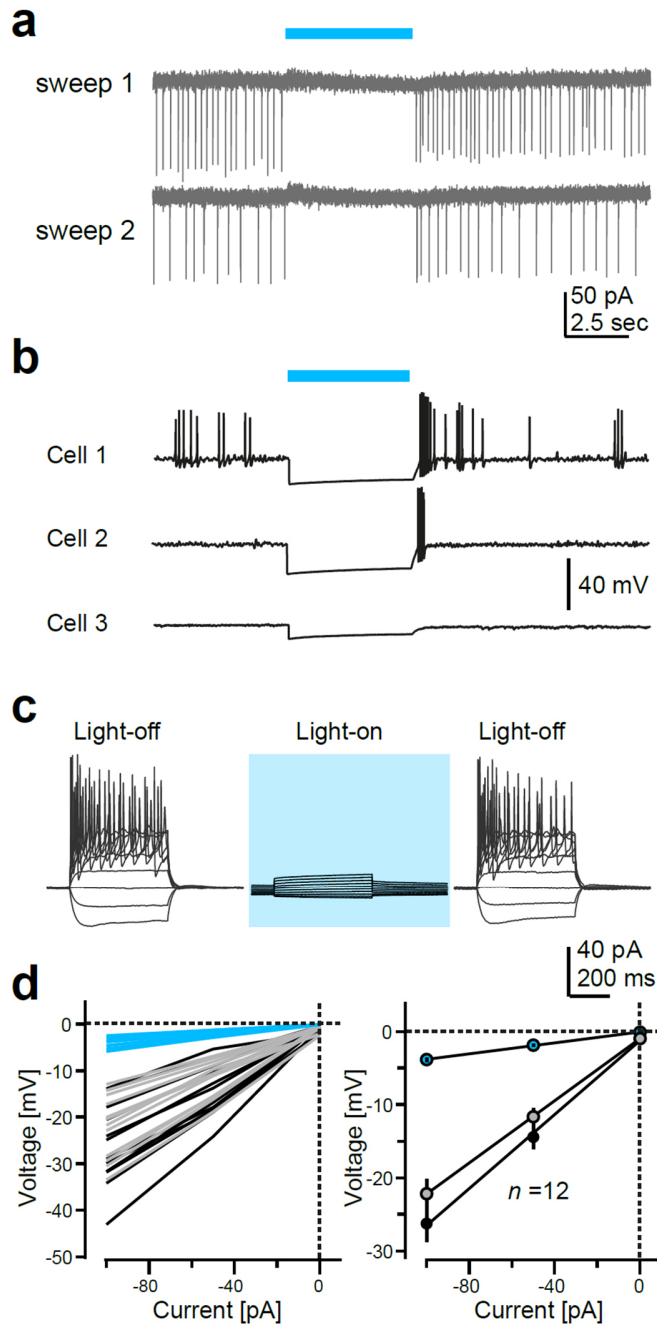

**Supplementary Fig. 10. Validation of inhibitory opsin in L6 corticothalamic (L6-CT) S1 hindlimb cortex (S1HL) neurons: stGtACR2-expressing L6-CT neurons are strongly hyperpolarized in response to laser stimulation and spiking is efficiently suppressed.**

**(a)** Effect of stGtACR2 activation on spontaneous spikes recorded in loose-cell attached mode.

**(b)** Effect of stGtACR2 activation on membrane potential, spontaneous action potential firing, and rebound potentials and spikes, recorded in current-clamp configuration. These exemplary cells were kept at ~40 mV by direct current injection through the recording pipette.

**(c)** A representative cell showing voltage responses triggered by injections of square pulses of current (500 ms, from -100 to +300 pA, 20 pA steps) before (left), during (middle), and after (right) stimulation with blue light.

**(d)** Left: Amplitude of membrane potential changes before (black), during (blue), and after (gray) light stimulation in stGtACR2-expressing L6-CT neurons ( $n = 12$ ). Right: summary plot of the effect of light activation on the slope of the current-voltage relationship (input resistance) in all 12 neurons.

Data represented as means  $\pm$  SEM. Source data for a-d are provided as a Source Data file.

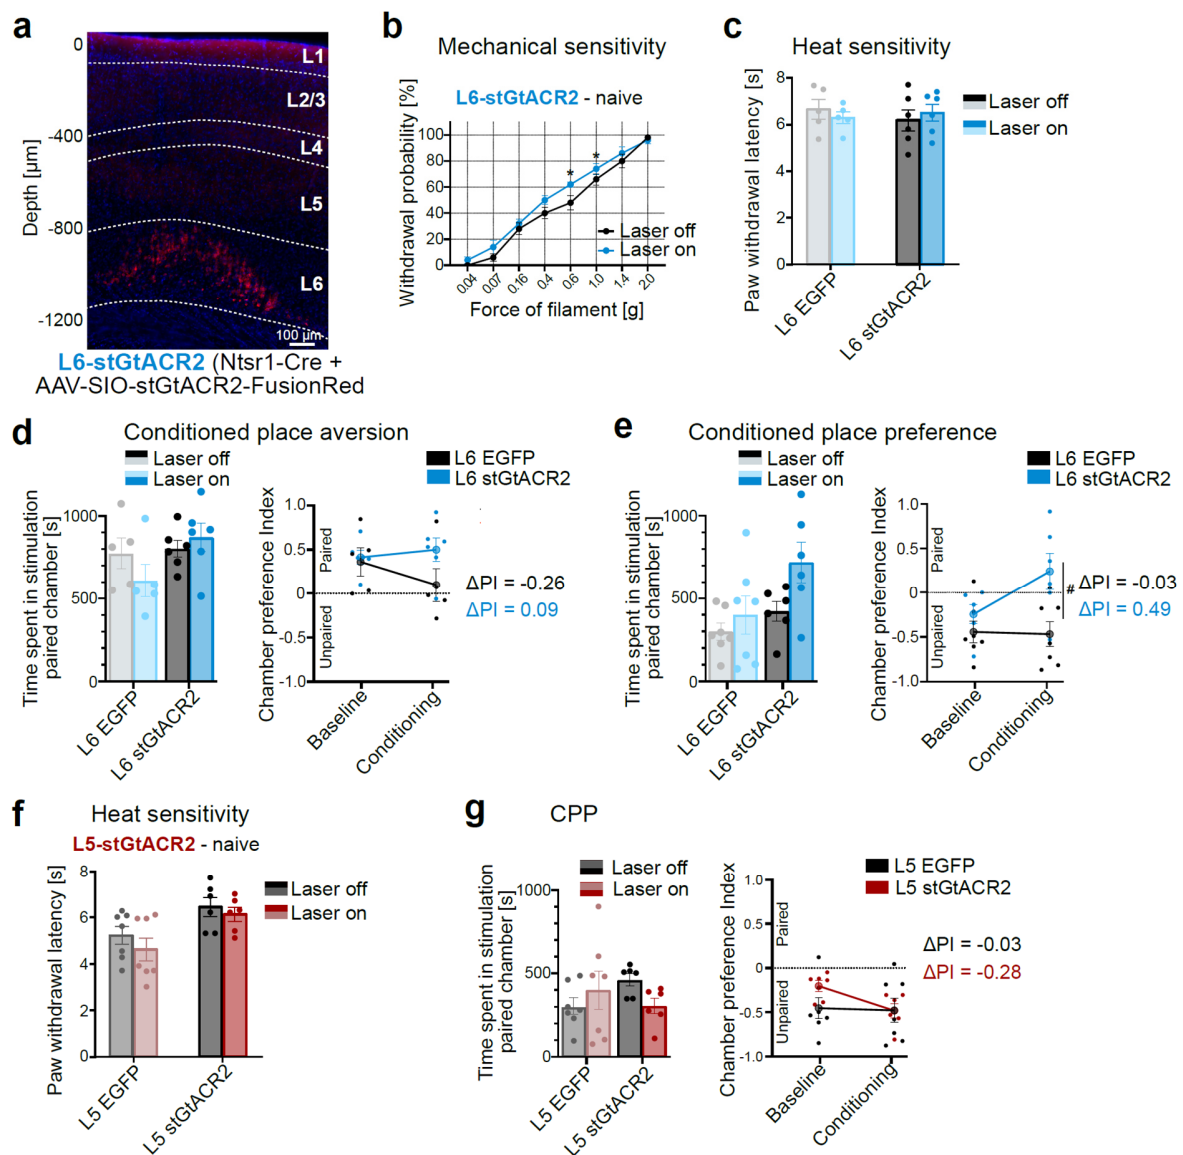

**Supplementary Fig. 11. Optogenetic inhibition of L6 corticothalamic (L6-CT) and Layer 5 (L5) activity in the S1 hindlimb cortex (S1HL).**

**(a)** Expression of stGtACR2-FusionRed (red) in L6 S1HL of a Ntsr1-Cre mouse showing fluorescence in L6-CT neurons. Depth is registered relative to S1HL layer borders (dashed lines, estimated based on soma sizes and densities using DAPI signals, blue). Representative example of  $n = 16$  independent experiments with similar results.

**(b)** Within-animal comparison of paw withdrawal probabilities in response to graded von Frey stimulation of the hindpaw at baseline (black, laser off) and during optogenetic inhibition (blue, laser on, 5 s continuous pulse) in the contralateral S1HL of L6-stGtACR2 mice ( $n = 10$ ).

**(c)** Paw withdrawal latencies in response to heat stimulation of the left hindpaw with (Laser on, blue, 5 s continuous pulse) and without (black, Laser off) optogenetic inhibition of L6-CT in the contralateral S1HL of L6-EGFP ( $n = 5$ ) and L6-stGtACR2 ( $n = 6$ ) mice.

**(d)** Conditioned place aversion (CPA). Population analysis of total time spent in the laser-paired chamber at baseline (Laser off, black/gray) and during inhibition (Laser on, blue 20 Hz laser stimulation in S1HL cortex) of L6-EGFP ( $n = 5$ ) and L6-stGtACR2 ( $n = 6$ ) naive mice. Average chamber preference indices (PI) for L6-stGtACR2 ( $n = 6$ ) and L6-EGFP ( $n = 5$ ) mice. A PI of 1 indicates a full preference for the paired chamber, while a PI of -1 indicates a full preference for the unpaired chamber, i.e. full avoidance of the laser-paired chamber. PIs were not significantly different between groups during laser stimulation or at baseline.

**(e)** Conditioned place preference (CPP). Population analysis of total time spent in the laser-paired chamber at baseline (Laser off, black/gray) and during inhibition (Laser on, blue 20 Hz laser stimulation in S1HL cortex) of L6-EGFP ( $n = 7$ ) and L6-stGtACR2 ( $n = 6$ ) mice with CFA-induced paw inflammation. Animals were injected with Complete Freund's adjuvant (CFA) (see Methods) one day before initiating the first baseline session. PIs for L6-stGtACR2 ( $n = 6$ ) and L6-EGFP ( $n = 7$ ) mice were significantly different between groups during laser stimulation ( $p = 0.0045$ ), but not at baseline.

**(f)** Optogenetic inhibition of L5 activity in the S1HL cortex. Paw withdrawal latencies in response to heat stimulation of the left hindpaw with (Laser on, red, 5 s continuous pulse) and without (black, Laser off) optogenetic inhibition of L5 in the contralateral S1HL of L5-EGFP ( $n = 7$ ) and L5-stGtACR2 ( $n = 6$ ) mice.

**(g)** CPP. Population analysis of total time spent in the laser-paired chamber at baseline (Laser off, black/gray) and during inhibition (Laser on, red 20 Hz laser stimulation in S1HL cortex) of L5-EGFP ( $n = 7$ ) and L5-stGtACR2 ( $n = 6$ ) mice with CFA-induced paw inflammation. Animals were injected with CFA (see Methods) one day before initiating the first baseline session. PIs for L5-stGtACR2 ( $n = 6$ ) and L5-EGFP ( $n = 7$ ) were not significantly different between groups during laser stimulation or at baseline.

\* and # represent  $p < 0.05$ ; Supplementary Fig. 11 b-g: Two-way repeated measures ANOVA with post-hoc Bonferroni test. Exact  $F$  and  $p$  values in Supplementary Table 1. Data are shown as mean  $\pm$  S.E.M. Source data for b-g are provided as a Source Data file.



## Conditioned place aversion

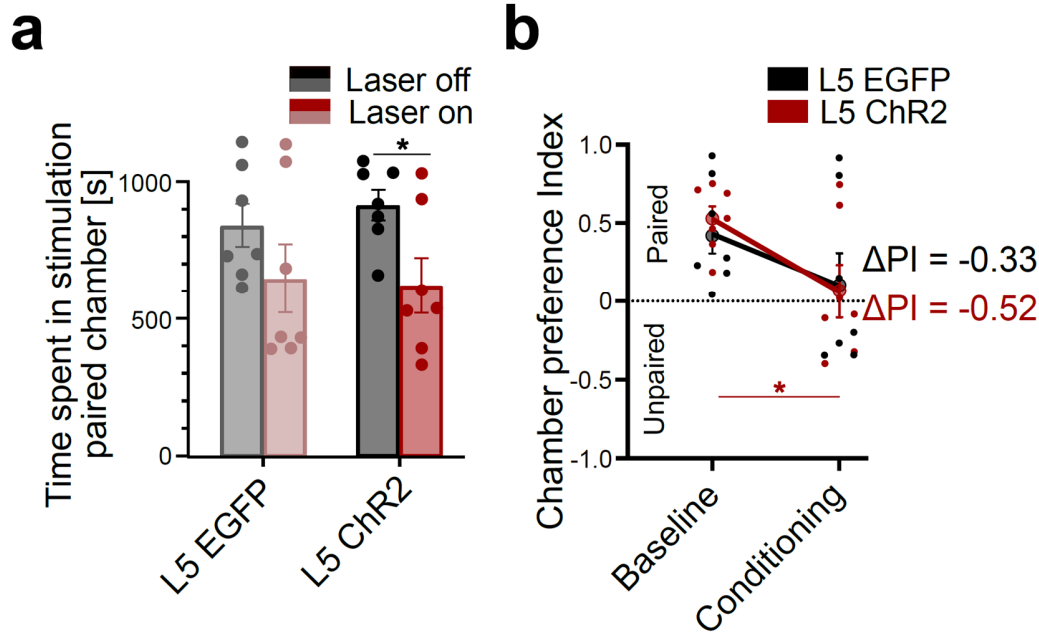

**Supplementary Fig. 12. Layer 5 (L5) ChR2 conditioned place aversion (CPA) test. Related to Figure 6.**

**(a)** Population analysis of total time spent in the laser-paired chamber at baseline (Laser off, black/gray) and during stimulation (Laser on, red 20 Hz laser stimulation in S1 hindlimb cortex (S1HL)) of L5-EGFP ( $n = 7$ ) and L5-ChR2 ( $n = 7$ ) mice.

**(b)** Average chamber preference indices (PI) for L5-ChR2 ( $n = 7$ ) and L5-EGFP ( $n = 7$ ) mice. A PI of 1 indicates a full preference for the paired chamber, while a PI of -1 indicates a full preference for the unpaired chamber, i.e. full avoidance of the laser-paired chamber. PIs were not significantly different between groups during laser stimulation or at baseline.

\* represents  $p < 0.05$ ; two-way repeated measures ANOVA with post-hoc Bonferroni test. Exact  $F$  and  $p$  values in Supplementary Table 1. Data are shown as mean  $\pm$  S.E.M. Source data for a, b are provided as a Source Data file.

Repeating the real-time place aversion paradigm (CPA) from Fig. 2 but with L5 stimulation, shows that L5-ChR2 mice spent less time in the laser-paired chamber relative to the time spent in the same chamber during the baseline session (i.e. without optogenetic stimulation). However, the avoidance in L5-ChR2 animals was much less pronounced compared to L6-ChR2 animals (Fig. 2 h-j). Furthermore, the chamber preference index shows that this avoidance effect is indistinguishable between L5-ChR2 and L5-EGFP controls (Supplementary Fig. 9b) suggesting that the avoidance stems entirely from the laser light (as seen also in the L6-EGFP controls, Fig. 2j). We conclude that L5 activation is much less aversive, if at all, compared to L6-CT activation.

| Figure | Group                             | <i>F</i> , <i>p</i> values, 95% confidence interval (CI)                                                                                                                                                                                                                                                                                                                                                                 | Statistical test                                              |
|--------|-----------------------------------|--------------------------------------------------------------------------------------------------------------------------------------------------------------------------------------------------------------------------------------------------------------------------------------------------------------------------------------------------------------------------------------------------------------------------|---------------------------------------------------------------|
| 2b     | L6-ChR2 naive von Frey            | $F = 72.25$ ; $p = 1.36 \times 10^{-5}$<br>0.04 g; $p = 0.357$<br>0.07 g; $p = 0.049$<br>0.16 g; $p = 0.035$<br>0.4 g; $p < 0.001$<br>0.6 g; $p = 0.001$<br>1.0 g; $p = 0.007$<br>1.4 g; $p = 0.567$<br>2.0 g; $p = 1$<br>CI Baseline = 45.5 to 62<br>CI Laser = 63.3 to 78.2                                                                                                                                            | Repeated measures ANOVA with post-hoc Bonferroni test         |
| 2c     | L6-ChR2 CFA von Frey              | $F = 17.07$ ; $p = 0.002$<br>0.04 g; $p = 0.005$<br>0.07 g; $p = 0.02$<br>0.16 g; $p = 0.41$<br>0.4 g; $p = 1$<br>0.6 g; $p = 0.96$<br>1.0 g; $p = 1$<br>1.4 g; $p = 1$<br>2.0 g; $p = 1$<br>CI Baseline = 71.7 to 84.3<br>CI Laser = 80.1 to 89.9                                                                                                                                                                       | Repeated measures ANOVA with post-hoc Bonferroni test         |
| 2d     | L6-ChR2 60% withdrawal thresholds | Baseline Naive - Laser Naive, $p = 4.4 \times 10^{-5}$ , CI -0.57 to -0.18<br>Baseline CFA - Laser CFA, $p = 0.926$ , CI -0.24 to 0.15<br>Laser Naive - Laser CFA, $p = 0.083$ , CI -0.02 to 0.38<br>Baseline Naive - Laser CFA, $p = 2.54 \times 10^{-8}$ , CI 0.36 to 0.76<br>Laser Naive - Baseline CFA, $p = 0.268$ , CI -0.06 to 0.33<br>Baseline Naive - Baseline CFA, $p = 1.59 \times 10^{-7}$ , CI 0.32 to 0.71 | Tukey's test                                                  |
| 2g     | L6-ChR2 CPA                       | $F = 17.56$ , $p = 0.002$<br>L6-EGFP (control) $p = 0.318$ , CI -121 to 452.1<br>L6-ChR2 (exper.) $p = 0.002$ , CI 189.2 to 673.4                                                                                                                                                                                                                                                                                        | Two-way repeated measures ANOVA with post-hoc Bonferroni test |
| 2h     | L6-ChR2 CPA preference indices    | $F = 17.93$ , $p = 0.002$<br>Between timepoints (within groups):<br>L6-EYFP (control) $p = 0.3946$ , CI -0.24 to 0.77<br>L6-ChR2 (exper.) $p = 0.0012$ , CI 0.37 to 1.2<br>Between groups (within timepoints):<br>Baseline $p = >0.999$ , CI -0.45 to 0.53<br>Conditioning $p = 0.0227$ , CI 0.07 to 1.06                                                                                                                | Two-way repeated measures ANOVA with post-hoc Bonferroni test |
| 3c     | VPL response fraction             | $\chi^2$ test statistic = 1997.5<br>$p = 2.2 \times 10^{-16}$                                                                                                                                                                                                                                                                                                                                                            | $\chi^2$ (two-sided) test followed by Marascuillo procedure   |
| 3e,f   | Change in spiking rate per unit   | $p < 0.05$<br>See Source Data for <i>p</i> -values for individual units.                                                                                                                                                                                                                                                                                                                                                 | Wilcoxon signed-rank or ZETA test                             |

|    |                                      |                                                                                                                                       |                                                          |
|----|--------------------------------------|---------------------------------------------------------------------------------------------------------------------------------------|----------------------------------------------------------|
| 3g | VPL modulation index                 | $p = 2.38 \times 10^{-49}$<br>L-M: $p = 1.73 \times 10^{-15}$<br>L-ML: $p = 3.63 \times 10^{-10}$<br>M-ML: $p = 1.15 \times 10^{-43}$ | Friedman test with post-hoc Wilcoxon signed-rank test    |
| 3h | VPL response probability             | $p < 0.001$<br>L-M: $p = 0.002$<br>L-ML: $p < 0.001$<br>M-ML: $p < 0.001$                                                             | Friedman test with post-hoc Wilcoxon signed-rank test    |
| 3i | Change in BP per unit                | $p < 0.05$<br>See Source Data for p-values for individual units.                                                                      | McNemar's test                                           |
|    | BP <sub>ML</sub> vs. BP <sub>M</sub> | $p < 0.001$                                                                                                                           | Wilcoxon signed-rank test                                |
| 4c | Cortex response fraction (L2/3)      | $X^2$ test statistic = 2808.9<br>$p < 2.2 \times 10^{-16}$                                                                            | $X^2$ (two-sided) test followed by Marascuillo procedure |
|    | Cortex response fraction (L4)        | $X^2$ test statistic = 2127.1<br>$p < 2.2 \times 10^{-16}$                                                                            | $X^2$ (two-sided) test followed by Marascuillo procedure |
|    | Cortex response fraction (L5)        | $X^2$ test statistic = 628.4<br>$p < 2.2 \times 10^{-16}$                                                                             | $X^2$ (two-sided) test followed by Marascuillo procedure |
|    | Cortex response fraction (L6)        | $X^2$ test statistic = 1261.3<br>$p < 2.2 \times 10^{-16}$                                                                            | $X^2$ (two-sided) test followed by Marascuillo procedure |
| 4e | Cortex modulation index (L2/3)       | $p = 0.0019$<br>L-M: $p = 0.303$<br>L-ML: $p = 1.97 \times 10^{-5}$<br>M-ML: $p = 1$                                                  | Friedman test with post-hoc Wilcoxon signed-rank test    |
|    | Cortex modulation index (L4)         | $p = 5.97 \times 10^{-5}$<br>L-M: $p = 0.221$<br>L-ML: $p = 3.27 \times 10^{-9}$<br>M-ML: $p = 1$                                     | Friedman test with post-hoc Wilcoxon signed-rank test    |
|    | Cortex modulation index (L5)         | $p = 6.48 \times 10^{-77}$<br>L-M: $p = 5.07 \times 10^{-49}$<br>L-ML: $p = 2.20 \times 10^{-12}$<br>M-ML: $p = 4.80 \times 10^{-47}$ | Friedman test with post-hoc Wilcoxon signed-rank test    |

|             | Cortex modulation index (L6)                           | $p = 2.10 \times 10^{-12}$<br>L-M: $p = 7.44 \times 10^{-6}$<br>L-ML: $p = 0.51$<br>M-ML: $p = 4.59 \times 10^{-5}$                                                                                                                                                                                                                                                                                                                                                                                                                                                                                                                                                                                                                                                                                                                                                                                                                                                                                                                                                                                                                                                                                                                                                                                                                                                                                                              | Friedman test with post-hoc Wilcoxon signed-rank test         |    |    |    |             |        |         |         |           |    |         |         |           |    |    |         |  |    |    |    |             |        |                      |         |           |    |                       |                       |           |    |    |                       |  |    |    |    |             |        |                        |        |           |    |                        |                       |           |    |    |                        |               |
|-------------|--------------------------------------------------------|----------------------------------------------------------------------------------------------------------------------------------------------------------------------------------------------------------------------------------------------------------------------------------------------------------------------------------------------------------------------------------------------------------------------------------------------------------------------------------------------------------------------------------------------------------------------------------------------------------------------------------------------------------------------------------------------------------------------------------------------------------------------------------------------------------------------------------------------------------------------------------------------------------------------------------------------------------------------------------------------------------------------------------------------------------------------------------------------------------------------------------------------------------------------------------------------------------------------------------------------------------------------------------------------------------------------------------------------------------------------------------------------------------------------------------|---------------------------------------------------------------|----|----|----|-------------|--------|---------|---------|-----------|----|---------|---------|-----------|----|----|---------|--|----|----|----|-------------|--------|----------------------|---------|-----------|----|-----------------------|-----------------------|-----------|----|----|-----------------------|--|----|----|----|-------------|--------|------------------------|--------|-----------|----|------------------------|-----------------------|-----------|----|----|------------------------|---------------|
|             | Change in spiking rate per unit                        | $p < 0.05$<br>See Source Data for p-values for individual units.                                                                                                                                                                                                                                                                                                                                                                                                                                                                                                                                                                                                                                                                                                                                                                                                                                                                                                                                                                                                                                                                                                                                                                                                                                                                                                                                                                 | Wilcoxon signed-rank or ZETA test                             |    |    |    |             |        |         |         |           |    |         |         |           |    |    |         |  |    |    |    |             |        |                      |         |           |    |                       |                       |           |    |    |                       |  |    |    |    |             |        |                        |        |           |    |                        |                       |           |    |    |                        |               |
| 4f          | MIs across layers                                      | L condition $p$ values<br><table style="margin-left: 20px;"> <thead> <tr> <th></th> <th>L4</th> <th>L5</th> <th>L6</th> </tr> </thead> <tbody> <tr> <td><b>L2/3</b></td> <td>0.1129</td> <td>0.00030</td> <td>0.00043</td> </tr> <tr> <td><b>L4</b></td> <td>na</td> <td>0.01418</td> <td>0.00180</td> </tr> <tr> <td><b>L5</b></td> <td>na</td> <td>na</td> <td>0.00355</td> </tr> </tbody> </table><br>M condition $p$ values<br><table style="margin-left: 20px;"> <thead> <tr> <th></th> <th>L4</th> <th>L5</th> <th>L6</th> </tr> </thead> <tbody> <tr> <td><b>L2/3</b></td> <td>0.4521</td> <td><math>2.1 \times 10^{-6}</math></td> <td>0.00030</td> </tr> <tr> <td><b>L4</b></td> <td>na</td> <td><math>6.3 \times 10^{-10}</math></td> <td><math>3.36 \times 10^{-9}</math></td> </tr> <tr> <td><b>L5</b></td> <td>na</td> <td>na</td> <td><math>3.7 \times 10^{-58}</math></td> </tr> </tbody> </table><br>ML condition $p$ value<br><table style="margin-left: 20px;"> <thead> <tr> <th></th> <th>L4</th> <th>L5</th> <th>L6</th> </tr> </thead> <tbody> <tr> <td><b>L2/3</b></td> <td>0.2828</td> <td><math>4.24 \times 10^{-11}</math></td> <td>0.0232</td> </tr> <tr> <td><b>L4</b></td> <td>na</td> <td><math>1.97 \times 10^{-23}</math></td> <td><math>4.05 \times 10^{-5}</math></td> </tr> <tr> <td><b>L5</b></td> <td>na</td> <td>na</td> <td><math>1.88 \times 10^{-43}</math></td> </tr> </tbody> </table> |                                                               | L4 | L5 | L6 | <b>L2/3</b> | 0.1129 | 0.00030 | 0.00043 | <b>L4</b> | na | 0.01418 | 0.00180 | <b>L5</b> | na | na | 0.00355 |  | L4 | L5 | L6 | <b>L2/3</b> | 0.4521 | $2.1 \times 10^{-6}$ | 0.00030 | <b>L4</b> | na | $6.3 \times 10^{-10}$ | $3.36 \times 10^{-9}$ | <b>L5</b> | na | na | $3.7 \times 10^{-58}$ |  | L4 | L5 | L6 | <b>L2/3</b> | 0.2828 | $4.24 \times 10^{-11}$ | 0.0232 | <b>L4</b> | na | $1.97 \times 10^{-23}$ | $4.05 \times 10^{-5}$ | <b>L5</b> | na | na | $1.88 \times 10^{-43}$ | Rank-sum test |
|             | L4                                                     | L5                                                                                                                                                                                                                                                                                                                                                                                                                                                                                                                                                                                                                                                                                                                                                                                                                                                                                                                                                                                                                                                                                                                                                                                                                                                                                                                                                                                                                               | L6                                                            |    |    |    |             |        |         |         |           |    |         |         |           |    |    |         |  |    |    |    |             |        |                      |         |           |    |                       |                       |           |    |    |                       |  |    |    |    |             |        |                        |        |           |    |                        |                       |           |    |    |                        |               |
| <b>L2/3</b> | 0.1129                                                 | 0.00030                                                                                                                                                                                                                                                                                                                                                                                                                                                                                                                                                                                                                                                                                                                                                                                                                                                                                                                                                                                                                                                                                                                                                                                                                                                                                                                                                                                                                          | 0.00043                                                       |    |    |    |             |        |         |         |           |    |         |         |           |    |    |         |  |    |    |    |             |        |                      |         |           |    |                       |                       |           |    |    |                       |  |    |    |    |             |        |                        |        |           |    |                        |                       |           |    |    |                        |               |
| <b>L4</b>   | na                                                     | 0.01418                                                                                                                                                                                                                                                                                                                                                                                                                                                                                                                                                                                                                                                                                                                                                                                                                                                                                                                                                                                                                                                                                                                                                                                                                                                                                                                                                                                                                          | 0.00180                                                       |    |    |    |             |        |         |         |           |    |         |         |           |    |    |         |  |    |    |    |             |        |                      |         |           |    |                       |                       |           |    |    |                       |  |    |    |    |             |        |                        |        |           |    |                        |                       |           |    |    |                        |               |
| <b>L5</b>   | na                                                     | na                                                                                                                                                                                                                                                                                                                                                                                                                                                                                                                                                                                                                                                                                                                                                                                                                                                                                                                                                                                                                                                                                                                                                                                                                                                                                                                                                                                                                               | 0.00355                                                       |    |    |    |             |        |         |         |           |    |         |         |           |    |    |         |  |    |    |    |             |        |                      |         |           |    |                       |                       |           |    |    |                       |  |    |    |    |             |        |                        |        |           |    |                        |                       |           |    |    |                        |               |
|             | L4                                                     | L5                                                                                                                                                                                                                                                                                                                                                                                                                                                                                                                                                                                                                                                                                                                                                                                                                                                                                                                                                                                                                                                                                                                                                                                                                                                                                                                                                                                                                               | L6                                                            |    |    |    |             |        |         |         |           |    |         |         |           |    |    |         |  |    |    |    |             |        |                      |         |           |    |                       |                       |           |    |    |                       |  |    |    |    |             |        |                        |        |           |    |                        |                       |           |    |    |                        |               |
| <b>L2/3</b> | 0.4521                                                 | $2.1 \times 10^{-6}$                                                                                                                                                                                                                                                                                                                                                                                                                                                                                                                                                                                                                                                                                                                                                                                                                                                                                                                                                                                                                                                                                                                                                                                                                                                                                                                                                                                                             | 0.00030                                                       |    |    |    |             |        |         |         |           |    |         |         |           |    |    |         |  |    |    |    |             |        |                      |         |           |    |                       |                       |           |    |    |                       |  |    |    |    |             |        |                        |        |           |    |                        |                       |           |    |    |                        |               |
| <b>L4</b>   | na                                                     | $6.3 \times 10^{-10}$                                                                                                                                                                                                                                                                                                                                                                                                                                                                                                                                                                                                                                                                                                                                                                                                                                                                                                                                                                                                                                                                                                                                                                                                                                                                                                                                                                                                            | $3.36 \times 10^{-9}$                                         |    |    |    |             |        |         |         |           |    |         |         |           |    |    |         |  |    |    |    |             |        |                      |         |           |    |                       |                       |           |    |    |                       |  |    |    |    |             |        |                        |        |           |    |                        |                       |           |    |    |                        |               |
| <b>L5</b>   | na                                                     | na                                                                                                                                                                                                                                                                                                                                                                                                                                                                                                                                                                                                                                                                                                                                                                                                                                                                                                                                                                                                                                                                                                                                                                                                                                                                                                                                                                                                                               | $3.7 \times 10^{-58}$                                         |    |    |    |             |        |         |         |           |    |         |         |           |    |    |         |  |    |    |    |             |        |                      |         |           |    |                       |                       |           |    |    |                       |  |    |    |    |             |        |                        |        |           |    |                        |                       |           |    |    |                        |               |
|             | L4                                                     | L5                                                                                                                                                                                                                                                                                                                                                                                                                                                                                                                                                                                                                                                                                                                                                                                                                                                                                                                                                                                                                                                                                                                                                                                                                                                                                                                                                                                                                               | L6                                                            |    |    |    |             |        |         |         |           |    |         |         |           |    |    |         |  |    |    |    |             |        |                      |         |           |    |                       |                       |           |    |    |                       |  |    |    |    |             |        |                        |        |           |    |                        |                       |           |    |    |                        |               |
| <b>L2/3</b> | 0.2828                                                 | $4.24 \times 10^{-11}$                                                                                                                                                                                                                                                                                                                                                                                                                                                                                                                                                                                                                                                                                                                                                                                                                                                                                                                                                                                                                                                                                                                                                                                                                                                                                                                                                                                                           | 0.0232                                                        |    |    |    |             |        |         |         |           |    |         |         |           |    |    |         |  |    |    |    |             |        |                      |         |           |    |                       |                       |           |    |    |                       |  |    |    |    |             |        |                        |        |           |    |                        |                       |           |    |    |                        |               |
| <b>L4</b>   | na                                                     | $1.97 \times 10^{-23}$                                                                                                                                                                                                                                                                                                                                                                                                                                                                                                                                                                                                                                                                                                                                                                                                                                                                                                                                                                                                                                                                                                                                                                                                                                                                                                                                                                                                           | $4.05 \times 10^{-5}$                                         |    |    |    |             |        |         |         |           |    |         |         |           |    |    |         |  |    |    |    |             |        |                      |         |           |    |                       |                       |           |    |    |                       |  |    |    |    |             |        |                        |        |           |    |                        |                       |           |    |    |                        |               |
| <b>L5</b>   | na                                                     | na                                                                                                                                                                                                                                                                                                                                                                                                                                                                                                                                                                                                                                                                                                                                                                                                                                                                                                                                                                                                                                                                                                                                                                                                                                                                                                                                                                                                                               | $1.88 \times 10^{-43}$                                        |    |    |    |             |        |         |         |           |    |         |         |           |    |    |         |  |    |    |    |             |        |                      |         |           |    |                       |                       |           |    |    |                       |  |    |    |    |             |        |                        |        |           |    |                        |                       |           |    |    |                        |               |
| 5d          | Median and 1st/3rd quartiles MI <sub>L</sub> per layer | $p < 0.01$<br>L2/3: 14/29 (48%) units (MI <sub>L</sub> -0.26 <b>-0.09</b> 0.05); L4: 25/52 (48%) units (MI <sub>L</sub> 0.08 <b>0.22</b> 0.41); L5: 96/150 (65%) units (MI <sub>L</sub> -0.69 <b>-0.23</b> 0.03); L6: 27/52 (52%) units (MI <sub>L</sub> 0.07 <b>0.37</b> 0.52). L2/3 vs. L5 and L4 vs. L6. were not significant.                                                                                                                                                                                                                                                                                                                                                                                                                                                                                                                                                                                                                                                                                                                                                                                                                                                                                                                                                                                                                                                                                                | Rank-sum test                                                 |    |    |    |             |        |         |         |           |    |         |         |           |    |    |         |  |    |    |    |             |        |                      |         |           |    |                       |                       |           |    |    |                       |  |    |    |    |             |        |                        |        |           |    |                        |                       |           |    |    |                        |               |
| 5e          | L5-stGtACR2 von Frey                                   | $F = 13.787$ ; $p = 0.014$<br>0.04 g; $p = 0.203$<br>0.07 g; $p = 0.004$<br>0.16 g; $p = 0.013$<br>0.4 g; $p = 0.041$<br>0.6 g; $p = 0.102$<br>1.0 g; $p = 0.175$<br>1.4 g; $p = 0.465$<br>2.0 g; $p = 1$<br>CI Baseline = 33.3 to 54.2<br>CI Laser = 46.6 to 65.1                                                                                                                                                                                                                                                                                                                                                                                                                                                                                                                                                                                                                                                                                                                                                                                                                                                                                                                                                                                                                                                                                                                                                               | Two-way repeated measures ANOVA with post-hoc Bonferroni test |    |    |    |             |        |         |         |           |    |         |         |           |    |    |         |  |    |    |    |             |        |                      |         |           |    |                       |                       |           |    |    |                       |  |    |    |    |             |        |                        |        |           |    |                        |                       |           |    |    |                        |               |
| 5f          | L5-stGtACR2 CPA                                        | $F = 11.75$ , $p = 0.006$<br>L5-EYFP (control) $p = 0.316$ , CI -138.7 to 528.1<br>L5-stGtACR2 (exper.) $p = 0.0150$ , CI 93.9 to 814.1                                                                                                                                                                                                                                                                                                                                                                                                                                                                                                                                                                                                                                                                                                                                                                                                                                                                                                                                                                                                                                                                                                                                                                                                                                                                                          | Two-way repeated measures ANOVA with post-hoc Bonferroni test |    |    |    |             |        |         |         |           |    |         |         |           |    |    |         |  |    |    |    |             |        |                      |         |           |    |                       |                       |           |    |    |                       |  |    |    |    |             |        |                        |        |           |    |                        |                       |           |    |    |                        |               |

|    |                                    |                                                                                                                                                                                                                                                                                                                                                                                               |                                                               |
|----|------------------------------------|-----------------------------------------------------------------------------------------------------------------------------------------------------------------------------------------------------------------------------------------------------------------------------------------------------------------------------------------------------------------------------------------------|---------------------------------------------------------------|
| 5g | L5-stGtACR2 CPA preference indices | $F = 11.69, p = 0.006$<br>Between time points (within groups):<br>L5-EYFP (control) $p = 0.3306$ , CI -0.25 to 0.91<br>L5-stGtACR2 (exper.) $p = 0.0146$ , CI 0.17 to 1.42<br>Between groups (within time points):<br>Baseline $p = >0.999$ , CI -0.81 to 0.59<br>Conditioning $p = 0.4805$ , CI 0.35 to 1.05                                                                                 | Two-way repeated measures ANOVA with post-hoc Bonferroni test |
| 6e | L5-ChR2 naive von Frey             | $F = 273.49; p = 1.48 \times 10^{-5}$<br>0.04 g; $p = 1$<br>0.07 g; $p = 0.007$<br>0.16 g; $p = 0.003$<br>0.4 g; $p = 0.003$<br>0.6 g; $p = 0.0003$<br>1.0 g; $p = 0.003$<br>1.4 g; $p = 0.003$<br>2.0 g; $p = 0.012$<br>CI Baseline = 44.7 to 64.9<br>CI Laser = 12.8 to 26.8                                                                                                                | Two-way repeated measures ANOVA with post-hoc Bonferroni test |
| 6f | L5-ChR2 CFA von Frey               | $F = 19.317; p = 0.001$<br>0.04 g; $p = 0.189$<br>0.07 g; $p = 0.007$<br>0.16 g; $p = 0.028$<br>0.4 g; $p = 0.035$<br>0.6 g; $p = 0.084$<br>1.0 g; $p = 0.105$<br>1.4 g; $p = 0.777$<br>2.0 g; $p = 1$<br>CI Baseline = 65.1 to 78.6<br>CI Laser = 46.7 to 62.5                                                                                                                               | Two-way repeated measures ANOVA with post-hoc Bonferroni test |
| 6g | L5-ChR2 60% withdrawal thresholds  | Baseline Naive - Laser Naive, $p = 0.0004$ , CI 0.46 to 1.82<br>Baseline CFA - Laser CFA, $p = 0.03$ , CI 0.038 to 0.996<br>Laser Naive - Laser CFA, $p = 0.0001$ , CI -0.49 to 1.66<br>Baseline Naive - Laser CFA, $p = 0.99$ , CI -0.52 to 0.65<br>Laser Naive - Baseline CFA, $p = 1.33 \times 10^{-7}$ , CI 1.01 to 2.18<br>Baseline Naive - Baseline CFA, $p = 0.177$ , CI -0.13 to 1.04 | Tukey's test                                                  |
| 6i | L5-ChR2 CPP                        | $F = 7.7572, p = 0.022$<br>L5-EGFP (control) $p = >0.999$ , CI -225.6 to 147.4<br>L5-ChR2 (exper.) $p = 0.0213$ , CI -448.7 to 40.09                                                                                                                                                                                                                                                          | Two-way repeated measures ANOVA with post-hoc Bonferroni test |
| 6j | L5-ChR2 CPP preference indices     | $F = 5.334, p = 0.046$<br>Between timepoints (within groups):<br>L6-EYFP (control) $p = >0.999$<br>L6-ChR2 (exper.) $p = 0.0298$<br>Between groups (within timepoints):<br>Baseline $p = 0.6967$ , CI -0.46 to 0.20<br>Conditioning $p = 0.0019$ , CI -0.86 to -0.20                                                                                                                          | Two-way repeated measures ANOVA with post-hoc Bonferroni test |

|     |                                                             |                                                                                                                                                                                                                                                                                                     |                                                               |
|-----|-------------------------------------------------------------|-----------------------------------------------------------------------------------------------------------------------------------------------------------------------------------------------------------------------------------------------------------------------------------------------------|---------------------------------------------------------------|
| 7a  | L5 vs L6-CT withdrawal probability (% change from baseline) | $F = 114.6; p = 3.99 \times 10^{-8}$<br>0.04 g; $p = 0.4080$<br>0.07 g; $p = 0.0013$<br>0.16 g; $p = 0.0016$<br>0.4 g; $p = 0.0055$<br>0.6 g; $p = 0.0014$<br>1.0 g; $p = 0.0090$<br>1.4 g; $p = 0.3384$<br>2.0 g; $p = 0.1437$<br>CI = -52.92 to -35.25                                            | Two-way repeated measures ANOVA with post-hoc Bonferroni test |
| 7b  | AUC L5 and L6-CT, Naive and CFA                             | Naive:<br>$F = 57.85; p = 2 \times 10^{-6}$<br>$p$ L5 = $1.77 \times 10^{-9}$<br>$p$ L6 = $5.04 \times 10^{-5}$<br>CI L5 = 70.01 to 99.6<br>CI L6 = -39.55 to -16.63<br><br>CFA:<br>$F = 7.69; p = 0.012$<br>L5 $p = 0.0001$<br>L6 $p = 0.841$<br>L5 CI = 15.78 to 45.30<br>L6 CI = -21.66 to 10.68 | Two-way repeated measures ANOVA with post-hoc Bonferroni test |
| S3b | L6-ChR2 Hargreaves                                          | $F = 9.51; p = 0.012$<br>L6-EGFP (control) $p = 0.92$ , CI -0.87 to 1.59<br>L6-ChR2 (exper.) $p = 0.006$ , CI 0.49 to 2.56                                                                                                                                                                          | Two-way repeated measures ANOVA with post-hoc Bonferroni test |
| S3c | L5-ChR2 Hargreaves                                          | $F = 2.15; p = 0.169$<br>L6-EGFP (control) $p = 0.55$ , CI -0.74 to 1.94<br>L6-ChR2 (exper.) $p = 0.75$ , CI -0.86 to 1.82                                                                                                                                                                          | Two-way repeated measures ANOVA with post-hoc Bonferroni test |
| S4a | L5-EGFP control von Frey                                    | $F = 0.625; p = 0.465$<br>0.04 g; $p = 1$<br>0.07 g; $p = 1$<br>0.16 g; $p = 0.651$<br>0.4 g; $p = 1$<br>0.6 g; $p = 1$<br>1.0 g; $p = 1$<br>1.4 g; $p = 1$<br>2.0 g; $p = 1$<br>CI Baseline = 38.6 to 58.9<br>CI Laser = 36.5 to 57.7                                                              | Two-way repeated measures ANOVA with post-hoc Bonferroni test |
| S4b | L6-EGFP control von Frey                                    | $F = 1.88; p = 0.229$<br>0.04 g; $p = 1$<br>0.07 g; $p = 1$<br>0.16 g; $p = 1$<br>0.4 g; $p = 1$<br>0.6 g; $p = 1$<br>1.0 g; $p = 1$<br>1.4 g; $p = 1$<br>2.0 g; $p = 1$<br>CI Baseline = 34.3 to 55.7                                                                                              | Two-way repeated measures ANOVA with post-hoc Bonferroni test |

|     |                                                                  |                                                                                                                                                                                                                                                                                                            |                                                               |
|-----|------------------------------------------------------------------|------------------------------------------------------------------------------------------------------------------------------------------------------------------------------------------------------------------------------------------------------------------------------------------------------------|---------------------------------------------------------------|
|     |                                                                  | CI Laser = 42 to 63                                                                                                                                                                                                                                                                                        |                                                               |
| S4c | L5-EGFP control von Frey CFA                                     | $F = 0.04; p = 0.847$<br>0.04 g; $p = 1$<br>0.07 g; $p = 1$<br>0.16 g; $p = 1$<br>0.4 g; $p = 1$<br>0.6 g; $p = 1$<br>1.0 g; $p = 1$<br>1.4 g; $p = 1$<br>2.0 g; $p = 1$<br>CI Baseline = 68.2 to 83.7<br>CI Laser = 68.8 to 84.3                                                                          | Two-way repeated measures ANOVA with post-hoc Bonferroni test |
| S4d | L6-EGFP control von Frey CFA                                     | $F = 0.115; p = 0.791$<br>0.04 g; $p = 1$<br>0.07 g; $p = 1$<br>0.16 g; $p = 1$<br>0.4 g; $p = 1$<br>0.6 g; $p = 1$<br>1.0 g; $p = 1$<br>1.4 g; $p = 1$<br>2.0 g; $p = 1$<br>CI Baseline = 57.6 to 77.4<br>CI Laser = 56.7 to 75.8                                                                         | Two-way repeated measures ANOVA with post-hoc Bonferroni test |
| S5  | L6-CT pre-/post-CFA                                              | $F = 57.43; p = 1.94 \times 10^{-7}$<br>0.04 g; $p = 0.001$<br>0.07 g; $p = 0.003$<br>0.16 g; $p = 7.28 \times 10^{-5}$<br>0.4 g; $p = 3.84 \times 10^{-6}$<br>0.6 g; $p = 0.0004$<br>1.0 g; $p = 0.0006$<br>1.4 g; $p = 0.008$<br>2.0 g; $p = 1$<br>CI Pre-CFA = 48.9 to 59.7<br>CI Post-CFA = 70 to 79.3 | Two-way repeated measures ANOVA with post-hoc Bonferroni test |
| S8b | VPL burst probability vs. laser strength                         | $\chi^2$ test statistic = 12.06<br>$p = 0.0134$<br>df = 4                                                                                                                                                                                                                                                  | Kruskal-Wallis test.                                          |
| S9b | Change in spiking rate per POM unit                              | $p < 0.05$<br>See Source Data for $p$ -values for individual units.                                                                                                                                                                                                                                        | Wilcoxon signed-rank or ZETA test                             |
| S9c | L6-CT enhanced/suppressed ratios for POM                         | $\chi^2$ test statistic = 301.7<br>$p = 1.79 \times 10^{-60}$                                                                                                                                                                                                                                              | $\chi^2$ (two-sided) test followed by Marascuillo procedure   |
|     | Suppression/enhancement ratios between VPL and POM per condition | $p = 4.0 \times 10^{-7}$<br>$p = 0$<br>$p = 0.0011$                                                                                                                                                                                                                                                        | Two-sided McNemar's test                                      |

|      |                                             |                                                                                                                                                                                                                                                                                                                     |                                                               |
|------|---------------------------------------------|---------------------------------------------------------------------------------------------------------------------------------------------------------------------------------------------------------------------------------------------------------------------------------------------------------------------|---------------------------------------------------------------|
| S9d  | L6-CT MIs between VPL and POm per condition | $p = 1.5 \times 10^{-10}$<br>$p = 9.1 \times 10^{-16}$<br>$p = 1.4 \times 10^{-18}$                                                                                                                                                                                                                                 | One-sided rank-sum test                                       |
| S11b | L6-stGtACR2 von Frey                        | $F = 15.059$ ; $p = 0.004$<br>0.04 g; $p = 0.168$<br>0.07 g; $p = 0.104$<br>0.16 g; $p = 0.343$<br>0.4 g; $p = 0.096$<br>0.6 g; $p = 0.01$<br>1.0 g; $p = 0.037$<br>1.4 g; $p = 0.081$<br>2.0 g; $p = 0.343$<br>CI Baseline = 38.1 to 53.4<br>CI Laser = 44.8 to 59.7                                               | Two-way repeated measures ANOVA with post-hoc Bonferroni test |
| S11c | L6-stGtACR2 Hargreaves                      | $F = 0.022$ , $p = 0.88$<br>L5-EGFP (control) $p = 0.252$ , CI -0.21 to 0.93<br>L5-ChR2 (exper.) $p = 0.277$ , CI -0.84 to 0.21                                                                                                                                                                                     | Two-way repeated measures ANOVA with post-hoc Bonferroni test |
| S11d | L6-stGtACR2 CPA                             | $F = 0.7378$ , $p = 0.41$<br>L6-EYFP (control) $p = 0.159$ , CI -59.15 to 390.1<br>L6-stGtACR2 (exper.) $p = 0.79$ , CI -273.2 to 136.9                                                                                                                                                                             | Two-way repeated measures ANOVA with post-hoc Bonferroni test |
|      | L6-stGtACR2 CPA preference indices          | $F = 0.8484$ , $p = 0.381$<br>Between timepoints (within groups):<br>L6-EYFP (control) $p = 0.1936$ , CI -0.12 to 0.65<br>L6-stGtACR2 (exper.) $p = >0.999$ , CI -0.43 to 0.26<br>Between groups (within timepoints):<br>Baseline $p = >0.999$ , CI -0.54 to 0.43<br>Conditioning $p = 0.1159$ , CI -0.89 to 0.08   | Two-way repeated measures ANOVA with post-hoc Bonferroni test |
| S11e | L6-stGtACR2 CPP                             | $F = 5.445$ , $p = 0.0396$<br>L6-EYFP (control) $p = 0.8006$ , CI -402.8 to 199.6<br>L6-stGtACR2 (exper.) $p = 0.0743$ , CI -622.7 to 27.99                                                                                                                                                                         | Two-way repeated measures ANOVA with post-hoc Bonferroni test |
|      | L6-stGtACR2 CPP preference indices          | $F = 2.332$ , $p = 0.155$<br>Between timepoints (within groups):<br>L6-EYFP (control) $p = >0.999$ , CI -0.51 to 0.56<br>L6-stGtACR2 (exper.) $p = 0.1011$ , CI -1.07 to 0.09<br>Between groups (within timepoints):<br>Baseline $p = 0.6890$ , CI -0.696 to 0.297<br>Conditioning $p = 0.0045$ , CI -1.21 to -0.22 | Two-way repeated measures ANOVA with post-hoc Bonferroni test |
| S11f | L5-stGtACR2 Hargreaves                      | $F = 5.798$ , $p = 0.0347$<br>L5-EGFP (control) $p = 0.0812$ , CI -0.07 to 1.27<br>L5-ChR2 (exper.) $p = 0.5622$ , CI -0.41 to 1.04                                                                                                                                                                                 | Two-way repeated measures ANOVA with post-hoc Bonferroni test |



|      |                                    |                                                                                                                                                                                                                                                                                                          |                                                               |
|------|------------------------------------|----------------------------------------------------------------------------------------------------------------------------------------------------------------------------------------------------------------------------------------------------------------------------------------------------------|---------------------------------------------------------------|
| S11g | L5-stGtACR2 CPP                    | $F = 0.3959, p = 0.54$<br>L5-EYFP (control) $p = 0.232$ , CI -256.1 to 52.87<br>L5-stGtACR2 (exper.) $p = 0.066$ , CI -10.1 to 323.6                                                                                                                                                                     | Two-way repeated measures ANOVA with post-hoc Bonferroni test |
|      | L5-stGtACR2 CPP preference indices | $F = 3.298, p = 0.09$<br>Between timepoints (within groups):<br>L5-EYFP (control) $p = >0.999$<br>L6-stGtACR2 (exper.) $p = 0.089$<br>Between groups (within timepoints):<br>Baseline $p = 0.236$ , CI -0.62 to 0.12<br>Conditioning $p = >0.999$ , CI -0.37 to 0.38                                     | Two-way repeated measures ANOVA with post-hoc Bonferroni test |
| S12a | L5 ChR2 CPA                        | $F = 17.56, p = 0.01$<br>L6-EGFP (control) $p = 0.218$ , CI -93.1 to 482.5<br>L6-ChR2 (exper.) $p = 0.045$ , CI 6.0 to 581.6                                                                                                                                                                             | Two-way repeated measures ANOVA with post-hoc Bonferroni test |
| S12b | L5 ChR2 CPA preference indices     | $F = 9.677, p = 0.009$<br>Between timepoints (within groups):<br>L5-EYFP (control) $p = 0.2207$ , CI -0.16 to 0.83<br>L5-ChR2 (exper.) $p = 0.0404$ , CI 0.02 to 1.01<br>Between groups (within timepoints):<br>Baseline $p = 0.9960$ , CI -0.67 to 0.37<br>Conditioning $p = >0.999$ , CI -0.48 to 0.55 | Two-way repeated measures ANOVA with post-hoc Bonferroni test |

**Supplementary table 1.** Description of statistical parameters and  $p$ - and  $F$ -values by figure.

|                  | <i>L</i>                            | <i>M</i>                          | <i>ML</i>                           |
|------------------|-------------------------------------|-----------------------------------|-------------------------------------|
| <b>L2/3 v L6</b> | <b>127 (0.029)</b>                  | <b>-75 (0.0004)</b>               | 53 (1)                              |
| <b>L4 v L6</b>   | <b>184 (8.5x10<sup>-6</sup>)</b>    | <b>-69 (0.00252)</b>              | 74 (1)                              |
| <b>L5 v L6</b>   | <b>190 (3.26x10<sup>-75</sup>)</b>  | <b>-57 (1.14x10<sup>-5</sup>)</b> | <b>235 (1.32x10<sup>-64</sup>)</b>  |
| <b>L4 v L5</b>   | <b>-414 (1.37x10<sup>-10</sup>)</b> | -30 (1)                           | <b>-227 (3.11x10<sup>-22</sup>)</b> |
| <b>L2/3 v L5</b> | <b>-351 (5.57x10<sup>-6</sup>)</b>  | -43 (0.164)                       | <b>-212 (1.51x10<sup>-11</sup>)</b> |
| <b>L2/3 v L4</b> | -20 (1)                             | -19 (0.893)                       | -13 (1)                             |

Modulation Indices: Two-way mixed model ANOVA, *F* layer = 125.521, *p* layer <0.0001, *F* Condition = 41.752, *p* Condition <0.0001, *F* Interaction = 41.752, *p* Interaction <0.0001

|                  | <i>L</i>                            | <i>M</i>                          | <i>ML</i>                           |
|------------------|-------------------------------------|-----------------------------------|-------------------------------------|
| <b>L2/3 v L6</b> | 122 (1)                             | <b>-89 (0.0005)</b>               | -7 (1)                              |
| <b>L4 v L6</b>   | 145 (0.0981)                        | <b>-88 (1.34x10<sup>-5</sup>)</b> | 56 (1)                              |
| <b>L5 v L6</b>   | <b>6610 (2.46x10<sup>-54</sup>)</b> | <b>-84 (1.22x10<sup>-5</sup>)</b> | <b>1345 (4.71x10<sup>-57</sup>)</b> |
| <b>L4 v L5</b>   | -96 (0.398)                         | -23 (1)                           | <b>-89 (0.0347)</b>                 |
| <b>L2/3 v L5</b> | -97 (0.0829)                        | -33 (1)                           | <b>-94 (0.00496)</b>                |
| <b>L2/3 v L4</b> | -9 (1)                              | -13 (1)                           | -41 (1)                             |

Evoked firing rate  $\bar{r}$ : Two-way mixed model ANOVA, *F* layer = 10.097, *p* layer < 0.0001, *F* Condition = 10.473, *p* Condition = 0.001, *F* Interaction = 40.116, *p* Interaction < 0.0001

**Supplementary table 2. Comparison of modulation index (top) and evoked firing rates (bottom) across cortical layers for L, M, and ML conditions (L6-CT activation).** Values shown are percentage change of median MI or  $\bar{r}$  values calculated as [(V1 - V2)/V2]. Significant values are shown in bold, relative enhancement in green, and relative suppression in red. For example, L4 vs. L5 ML = -89 indicates that L5 was suppressed relative to L4 for the ML condition.

| Optogenetic manipulation | Test       | Effect                          | Number of mice | <i>p</i> value                   |
|--------------------------|------------|---------------------------------|----------------|----------------------------------|
| L6-ChR2                  | Von Frey   | increased sensitivity           | <i>n</i> = 10  | <i>p</i> = 1.36x10 <sup>-5</sup> |
|                          | Hargreaves | increased sensitivity           | <i>n</i> = 7   | <i>p</i> = 0.021                 |
|                          | CPA        | aversion                        | <i>n</i> = 7   | <i>p</i> = 0.0298                |
| L5-ChR2                  | Von Frey   | decreased sensitivity           | <i>n</i> = 6   | <i>p</i> = 1.48x10 <sup>-5</sup> |
|                          | Hargreaves | no effect                       | <i>n</i> = 6   | <i>p</i> = 0.231                 |
|                          | CPA        | no effect (only laser aversion) | <i>n</i> = 7   | <i>p</i> = 0.312                 |
|                          | CPP        | place preference                | <i>n</i> = 5   | <i>p</i> = 0.045                 |
| L6-stGtACR2              | Von Frey   | small increase in sensitivity   | <i>n</i> = 10  | <i>p</i> = 0.004                 |
|                          | Hargreaves | no effect                       | <i>n</i> = 6   | <i>p</i> = 0.88                  |
|                          | CPA        | no effect                       | <i>n</i> = 6   | <i>p</i> = 0.7904                |
|                          | CPP        | no effect                       | <i>n</i> = 6   | <i>p</i> = 0.074                 |
| L5-stGtACR2              | Von Frey   | increased sensitivity           | <i>n</i> = 6   | <i>p</i> = 0.014                 |
|                          | Hargreaves | no effect                       | <i>n</i> = 6   | <i>p</i> = 0.5622                |
|                          | CPA        | aversion                        | <i>n</i> = 6   | <i>p</i> = 0.0150                |
|                          | CPP        | no effect                       | <i>n</i> = 6   | <i>p</i> = 0.0662                |

**Supplementary table 3.** Summary of the effects of optogenetic manipulations of L6-CT and L5 activity on mechanical and thermal sensitivity, conditioned place preference and conditioned place aversion. Two-way ANOVA for repeated measures with Bonferroni tests for multiple comparisons were used.

### **Supplementary References**

1. Schmitt, L. I. *et al.* Thalamic amplification of cortical connectivity sustains attentional control. *Nature* **545**, 219–223 (2017).
2. Cheah, M., Fawcett, J. W. & Andrews, M. R. Assessment of Thermal Pain Sensation in Rats and Mice Using the Hargreaves Test. *Bio Protoc* **7**, (2017).
